# Supplementary material for: Clostridium butyricum and Chitooligosaccharides in Synbiotic Combination Ameliorate Symptoms in a DSS-Induced Ulcerative Colitis Mouse Model by Modulating Gut Microbiota and Enhancing Intestinal Barrier Function
Source: PubMed Central journal article supplement (PMC10100383; doi:10.1128/spectrum.04370-22), 2023-03-28
Supplement: spectrum.04370-22-s0001.pdf [file spectrum.04370-22-s0001.pdf]

## Supplemental Data

**Fig. S1.** Effect of COS on in vitro proliferation and acid production of CB. (A) Proliferation of CB on reinforced clostridial medium (RCM) with four carbon sources (a-d) as below. (B) Acetate content. (C) Butyrate content. a: no carbon source. b: COS (5 g/L) as sole carbon source. c: COS (2.5 g/L) + glucose (2.5 g/L) as complex carbon source. d: COS (5 g/L) + glucose (5 g/L) as complex carbon source. \*  $p < 0.05$ ; \*\*  $p < 0.01$ .

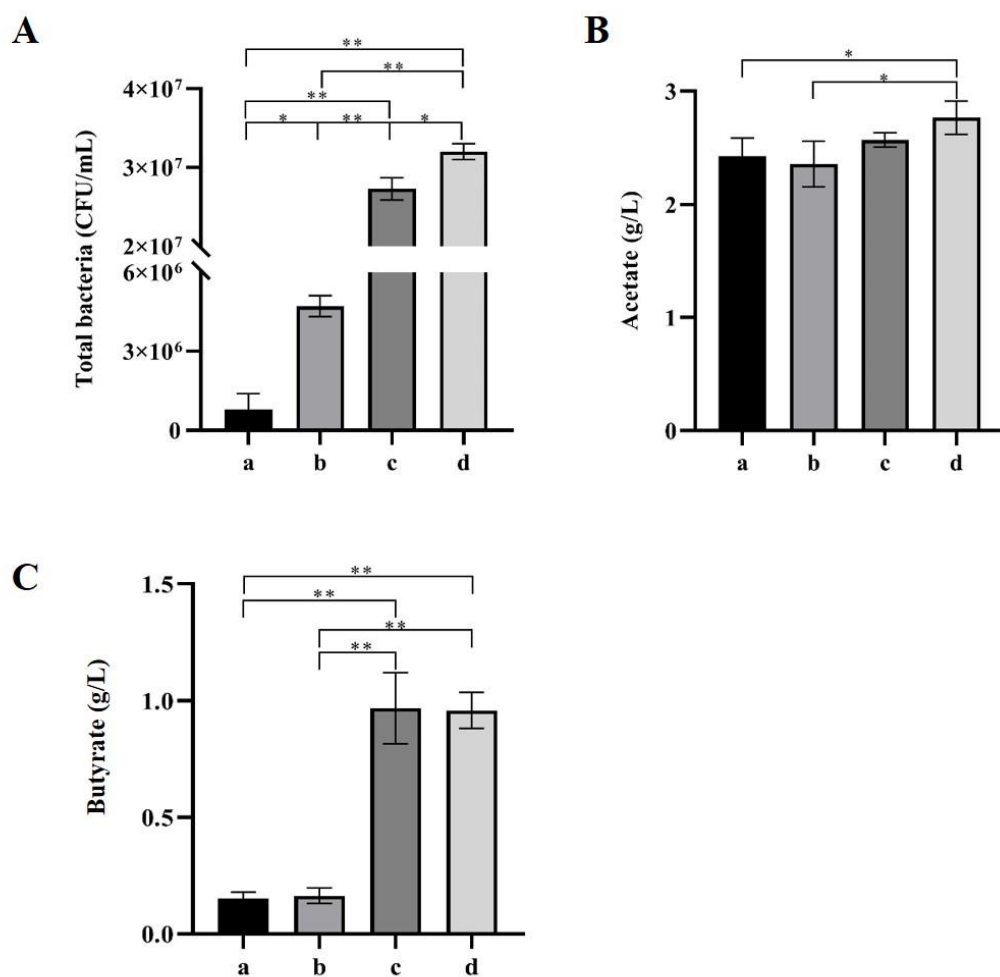

Table S1. Sequences of primers used for RT-qPCR.

| <b>Target gene</b> | <b>Forward primer (5'-3')</b> | <b>Reverse primer (5'-3')</b> |
|--------------------|-------------------------------|-------------------------------|
| $\beta$ -actin     | CTACCTCATGAAGATCCTGACC        | CACAGCTTCTCTTTGATGTCAC        |
| ZO-1               | GCGAACAGAAGGAGCGAGAAGAG       | GCTTTGCGGGCTGACTGGAG          |
| occludin           | TGGCTATGGAGGCGGCTATGG         | AAGGAAGCGATGAAGCAGAAGGC       |
| claudin-1          | GCTGGGTTTCATCCTGGCTTCTC       | CCTGAGCGGTCACGATGTTGTC        |
| MUC2               | ATGCCACCTCCTCAAAGAC           | GTAGTTCCGTTGGAACAGTGAA        |
